# Supplementary material for: Classifying chronic pain using multidimensional pain-agnostic symptom assessments and clustering analysis
Source: PubMed Central journal article supplement (PMC8442889; doi:10.1126/sciadv.abj0320), 2021-09-08
Supplement: sciadv.abj0320_sm.pdf [file sciadv.abj0320_sm.pdf]

Supplementary Materials for

**Classifying chronic pain using multidimensional pain-agnostic  
symptom assessments and clustering analysis**

Gadi Gilam\*, Eric M. Cramer, Kenneth A. Webber II, Maisa S. Ziadni,  
Ming-Chih Kao, Sean C. Mackey

\*Corresponding author. Email: [gadi.gilam@stanford.edu](mailto:gadi.gilam@stanford.edu)

Published 8 September 2021, *Sci. Adv.* 7, eabj0320 (2021)  
DOI: [10.1126/sciadv.abj0320](https://doi.org/10.1126/sciadv.abj0320)

**This PDF file includes:**

Figs. S1 to S4  
Tables S1 to S5

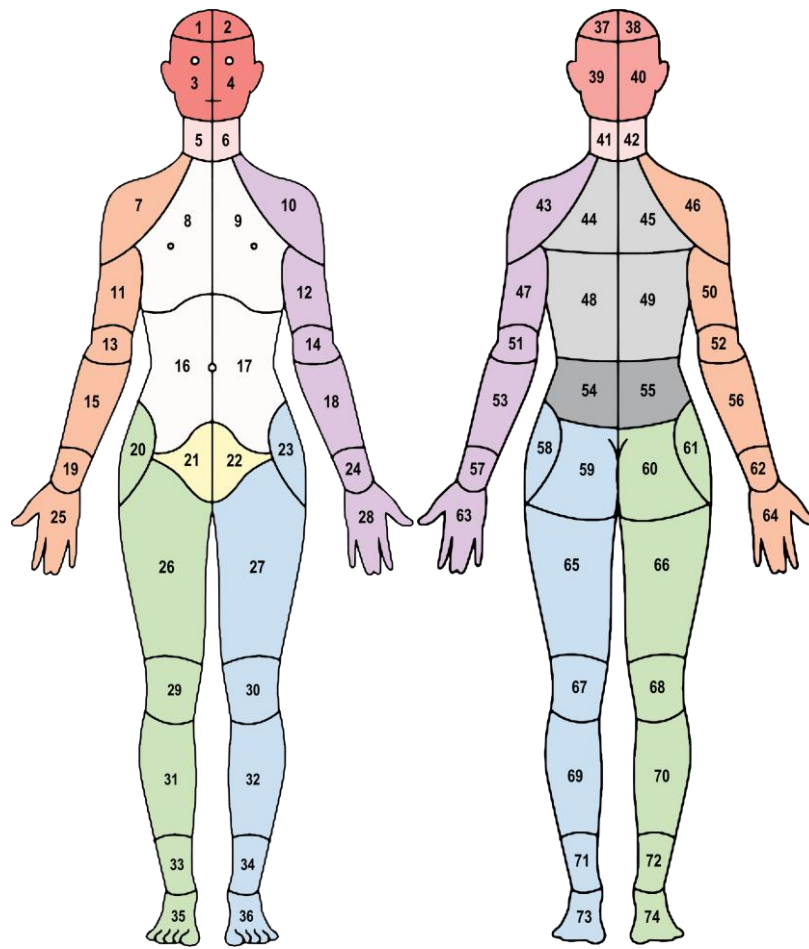

**Fig. S1.** CHOIR body map with 74 numbered segments and 11 colored body regions (see also Table S2).

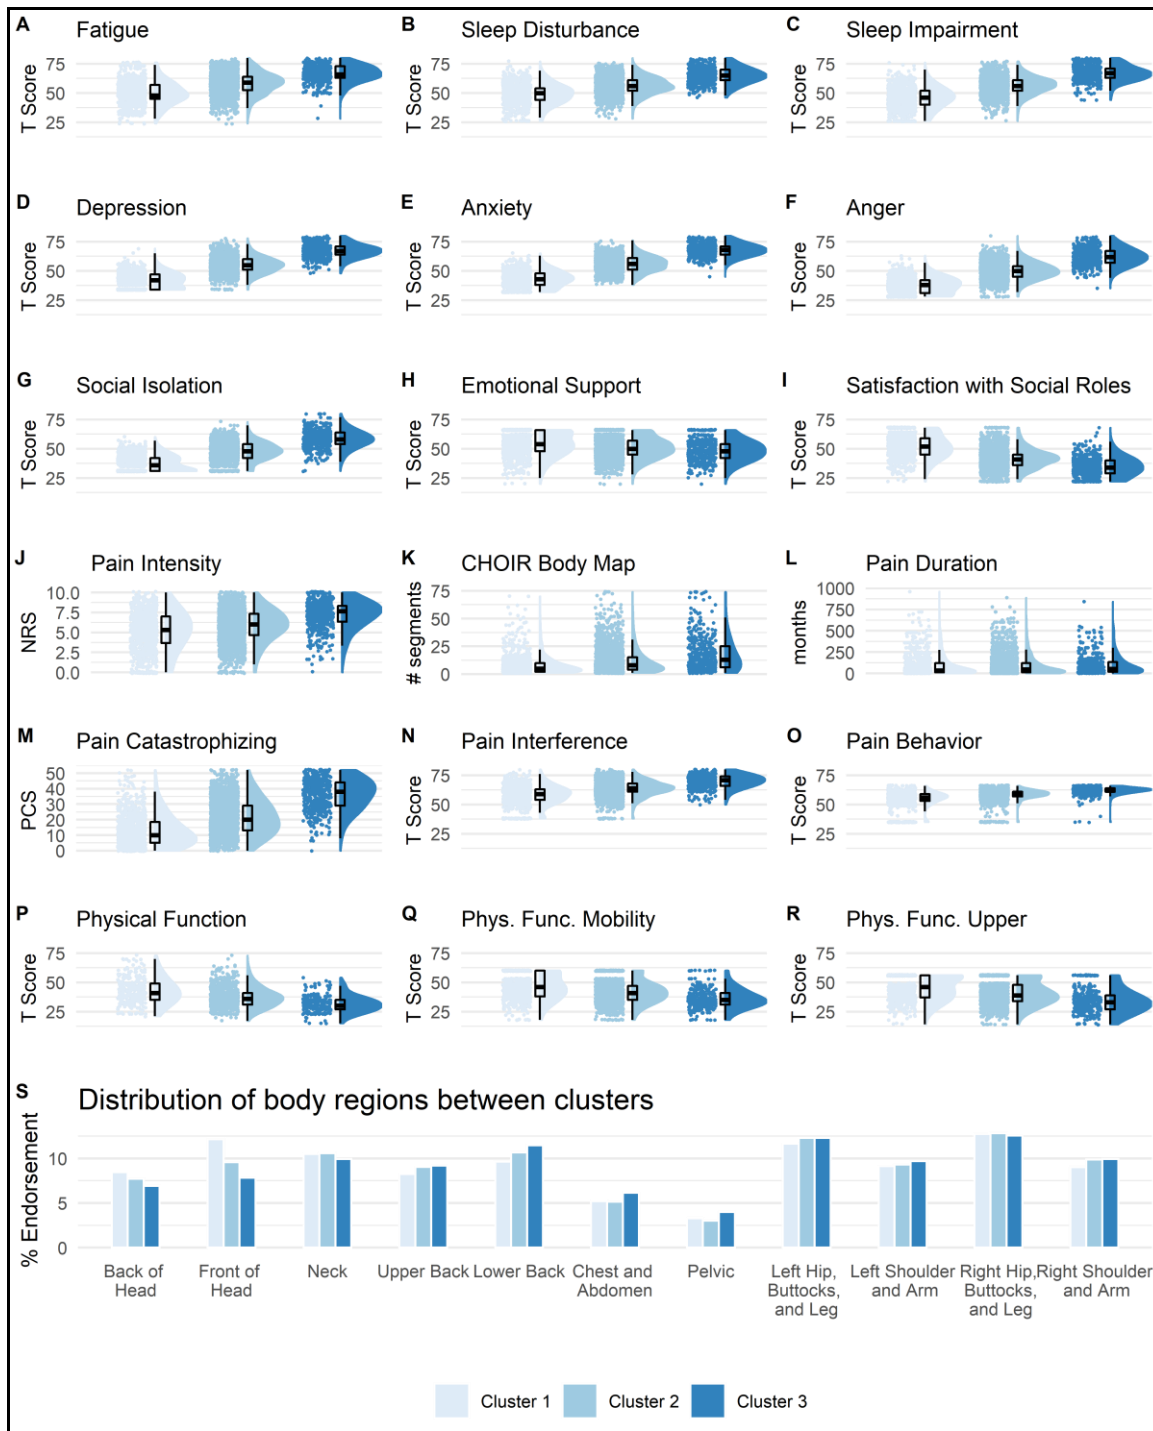

**Fig. S2.** Clusters validation in the *validation* dataset (n=3817). A graded scale of severity is manifested again across all clustering symptoms (A-I), as well as on almost all pain-specific measures (J-R), except for pain duration (L,  $p=0.724$ ), such that Cluster1 reflects a low severity, Cluster2 a medium severity, and Cluster3 the worst severity. Raincloud plots combining jittered raw data, data distribution, and boxplots were generated using open source code (93). Complementary descriptive and inferential statistical information is provided in Table S3. (S) The plot shows the % endorsement of 11 body regions as distributed in each of the clusters. There was no significant association in the distribution of % endorsed body regions between the clusters ( $\text{Chi}^2=1.71$ ,  $p=0.99$ ). NRS=Numerical Rating Scale; PCS=Pain Catastrophizing Scale.

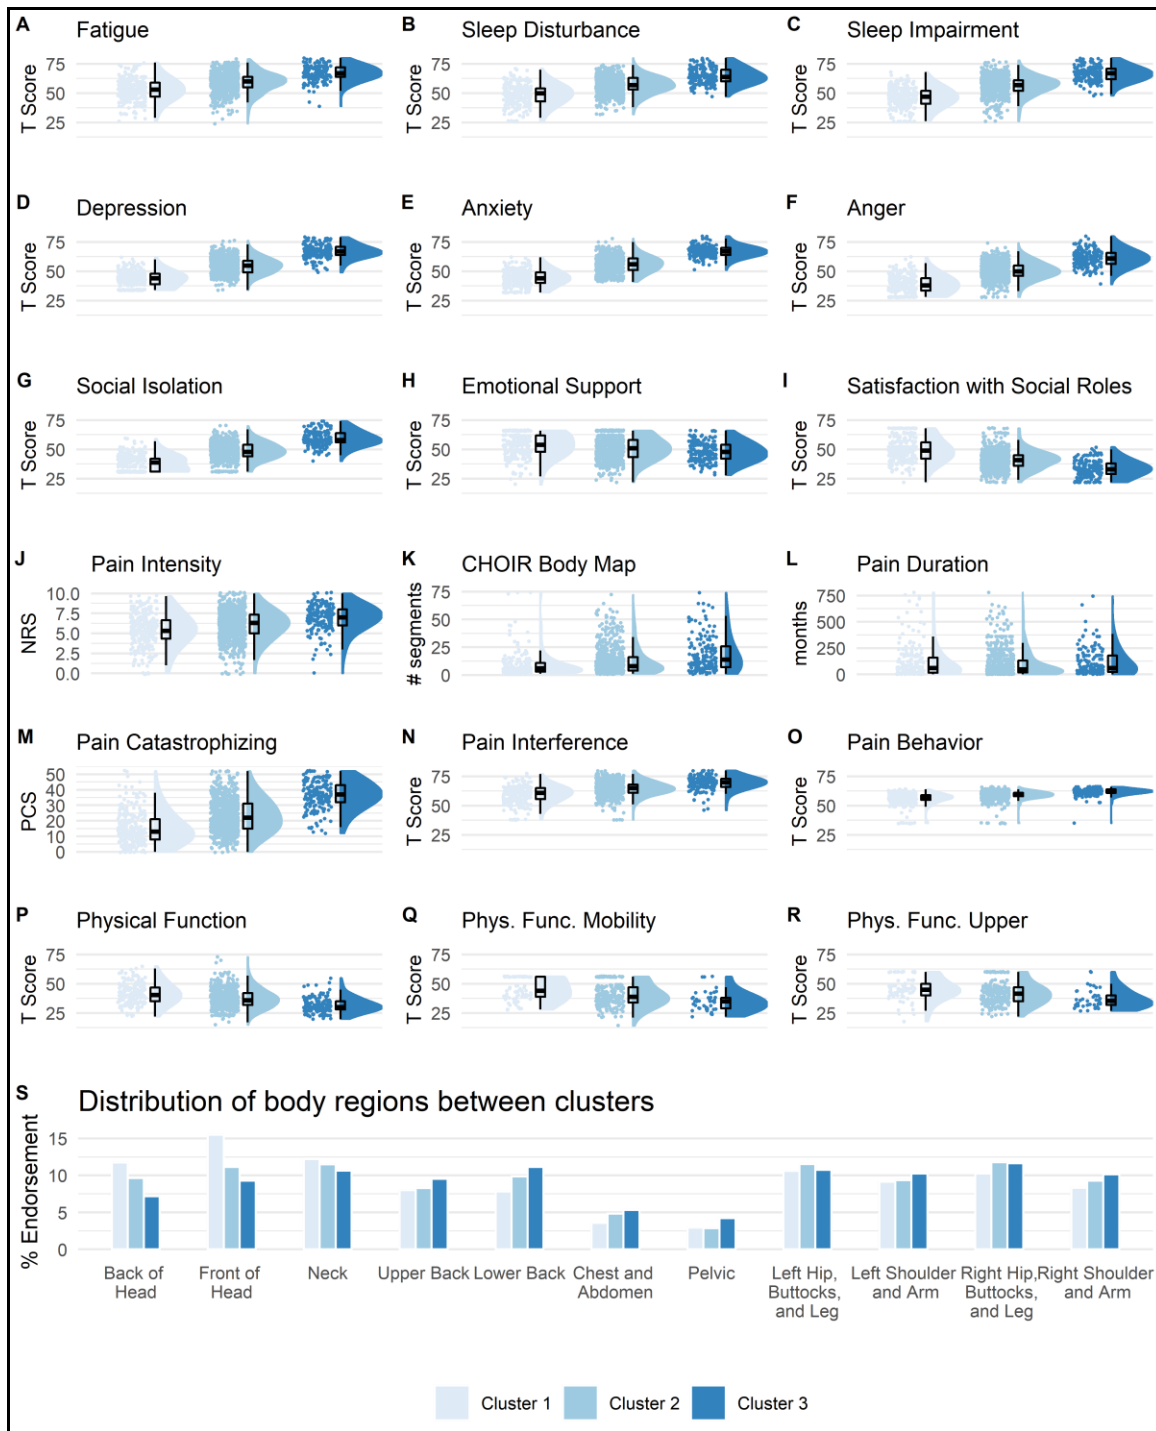

**Fig. S3.** Clusters validation in the *longitudinal* dataset, at baseline (n=1273). A graded scale of severity is manifested again across all clustering symptoms (A-I), as well as on almost all pain-specific measures (J-R), except for pain duration (L,  $p=0.12$ ), such that Cluster1 reflects a low severity, Cluster2 a medium severity, and Cluster3 the worst severity. Raincloud plots combining jittered raw data, data distribution, and boxplots were generated using open source code (93). Complementary descriptive and inferential statistical information is provided in Table S4. (S) The plot shows the % endorsement of 11 body regions as distributed in each of the clusters. There was no significant association in the distribution of % endorsed body regions between the clusters ( $\text{Chi}^2=4.75$ ,  $p=0.99$ ). NRS=Numerical Rating Scale; PCS=Pain Catastrophizing Scale.

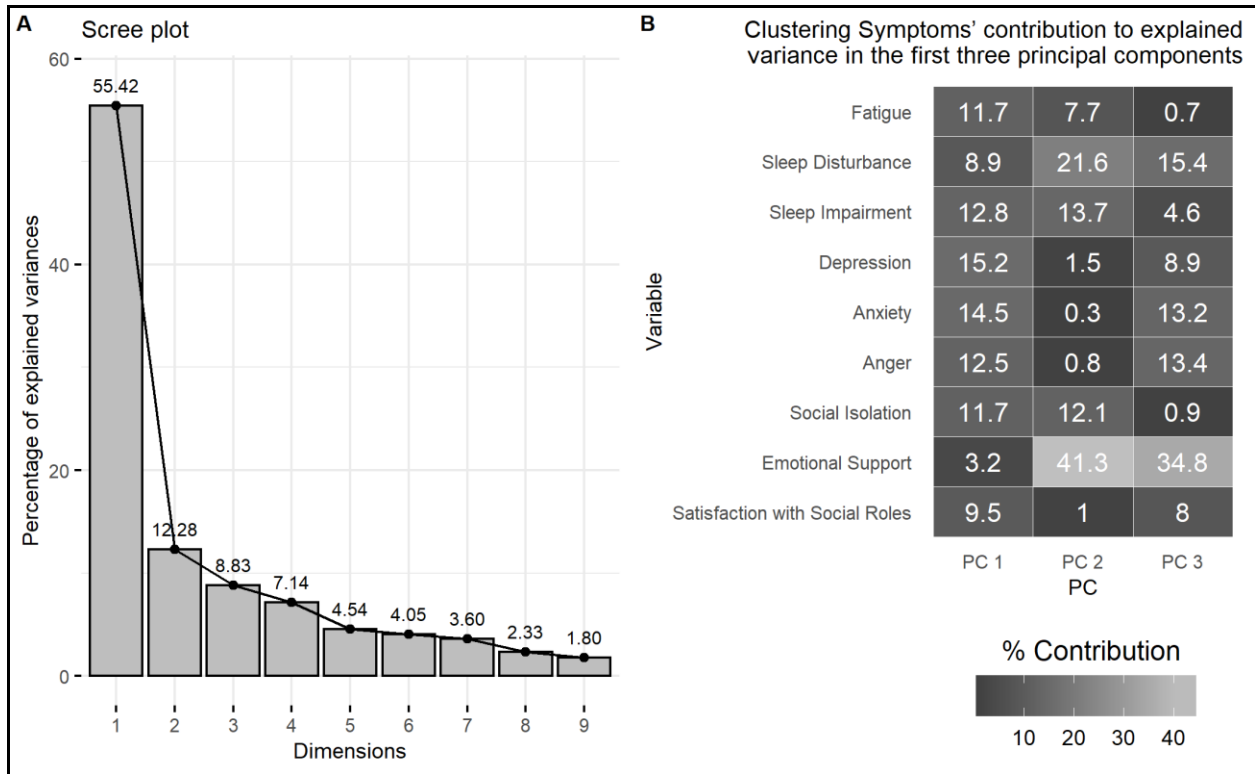

**Fig. S4.** Principal Component Analysis (PCA) applied on the nine clustering symptoms. **(A)** Scree plot indicating the percent of explained variance in the data by each of the nine principal components (PCs). For example, 55.42% of the variance is explained by PC 1. **(B)** The percent contribution of each of the nine clustering symptoms in accounting for the variability in the first three PCs. Variables that are mostly contributing to PC 1 are the most important in explaining the variability in the dataset. The negative affect-related factors Depression, Anxiety, and Anger, are ranked 1<sup>st</sup>, 2<sup>nd</sup>, and 4<sup>th</sup>, respectively, and contribute together 42.2% to PC 1.

| N (%)                            | Total         | Cluster1     | Cluster2     | Cluster3     | p*   |
|----------------------------------|---------------|--------------|--------------|--------------|------|
| <b>Total:</b>                    | 16538         | 4137 (25.02) | 8975 (54.27) | 3426 (20.72) |      |
| <b>Age (years):</b>              |               |              |              |              | 0.97 |
| 18-29                            | 2057 (12.44)  | 525 (12.69)  | 1070 (11.92) | 462 (13.49)  |      |
| 30-39                            | 2794 (16.89)  | 701 (16.94)  | 1463 (16.3)  | 630 (18.39)  |      |
| 40-49                            | 3103 (18.76)  | 692 (16.73)  | 1640 (18.27) | 771 (22.5)   |      |
| 50-59                            | 3497 (21.15)  | 776 (18.76)  | 1930 (21.5)  | 791 (23.09)  |      |
| 60-69                            | 2882 (17.43)  | 797 (19.27)  | 1606 (17.89) | 479 (13.98)  |      |
| ≥70                              | 2173 (13.14)  | 638 (15.42)  | 1247 (13.89) | 288 (8.41)   |      |
| No response                      | 32 (0.19)     | 8 (0.19)     | 19 (0.21)    | 5 (0.15)     |      |
| <b>Sex</b>                       |               |              |              |              | 0.96 |
| Female                           | 10701 (64.71) | 2578 (62.32) | 5824 (64.89) | 2299 (67.1)  |      |
| Male                             | 5283 (31.94)  | 1431 (34.59) | 2841 (31.65) | 1011 (29.51) |      |
| No response                      | 554 (3.35)    | 128 (3.09)   | 310 (3.45)   | 116 (3.39)   |      |
| <b>Ethnicity</b>                 |               |              |              |              | 0.97 |
| Hispanic/Latino                  | 1677 (10.14)  | 429 (10.37)  | 807 (8.99)   | 441 (12.87)  |      |
| Non-Hispanic/Non-Latino          | 12322 (74.51) | 3125 (75.54) | 6800 (75.77) | 2397 (69.96) |      |
| Patient refused                  | 514 (3.11)    | 137 (3.31)   | 278 (3.1)    | 99 (2.89)    |      |
| Unknown                          | 611 (3.69)    | 168 (4.06)   | 331 (3.69)   | 112 (3.27)   |      |
| No response                      | 1414 (8.55)   | 278 (6.72)   | 759 (8.46)   | 377 (11)     |      |
| <b>Race</b>                      |               |              |              |              | 0.99 |
| American Indian or Alaska Native | 79 (0.48)     | 17 (0.41)    | 40 (0.45)    | 22 (0.64)    |      |
| Asian                            | 1348 (8.15)   | 397 (9.6)    | 714 (7.96)   | 237 (6.92)   |      |
| Asian, non-Hispanic              | 10 (0.06)     | 1 (0.02)     | 6 (0.07)     | 3 (0.09)     |      |
| Black or African American        | 560 (3.39)    | 141 (3.41)   | 270 (3.01)   | 149 (4.35)   |      |
| Black, non-Hispanic              | 10 (0.06)     | 4 (0.1)      | 3 (0.03)     | 3 (0.09)     |      |
| Native American, Hispanic        | 1 (0.01)      | 0 (0)        | 0 (0)        | 1 (0.03)     |      |
| Native American, non-Hispanic    | 2 (0.01)      | 1 (0.02)     | 1 (0.01)     | 0 (0)        |      |
| Native Hawaiian or Other Pacific | 83 (0.5)      | 19 (0.46)    | 44 (0.49)    | 20 (0.58)    |      |
| Other                            | 2807 (16.97)  | 706 (17.07)  | 1453 (16.19) | 648 (18.91)  |      |
| Other, Hispanic                  | 16 (0.1)      | 3 (0.07)     | 12 (0.13)    | 1 (0.03)     |      |
| Other, non-Hispanic              | 8 (0.05)      | 2 (0.05)     | 5 (0.06)     | 1 (0.03)     |      |
| Patient Refused                  | 482 (2.91)    | 128 (3.09)   | 258 (2.87)   | 96 (2.8)     |      |
| Unknown                          | 628 (3.8)     | 163 (3.94)   | 342 (3.81)   | 123 (3.59)   |      |
| White                            | 8909 (53.87)  | 2226 (53.81) | 4970 (55.38) | 1713 (50)    |      |
| White, Hispanic                  | 3 (0.02)      | 1 (0.02)     | 1 (0.01)     | 1 (0.03)     |      |
| White, non-Hispanic              | 154 (0.93)    | 41 (0.99)    | 86 (0.96)    | 27 (0.79)    |      |
| No response                      | 1438 (8.7)    | 287 (6.94)   | 770 (8.58)   | 381 (11.12)  |      |
| <b>Marital Status</b>            |               |              |              |              | 0.72 |
| Married                          | 8648 (52.29)  | 2489 (60.16) | 4722 (52.61) | 1437 (41.91) |      |
| Separated                        | 355 (2.15)    | 54 (1.31)    | 182 (2.03)   | 119 (3.47)   |      |
| Widowed                          | 636 (3.85)    | 162 (3.92)   | 357 (3.98)   | 117 (3.42)   |      |
| Never Married                    | 3105 (18.77)  | 700 (16.92)  | 1659 (18.48) | 746 (21.77)  |      |
| Living Together                  | 994 (6.01)    | 230 (5.56)   | 546 (6.08)   | 218 (6.36)   |      |
| Divorced                         | 1771 (10.71)  | 337 (8.15)   | 973 (10.84)  | 461 (13.46)  |      |
| No response                      | 1029 (6.22)   | 165 (3.99)   | 536 (5.97)   | 328 (9.57)   |      |
| <b>Education (years):</b>        |               |              |              |              | 0.36 |
| ≤12                              | 471 (2.85)    | 102 (2.47)   | 224 (2.5)    | 145 (4.23)   |      |
| 13-16                            | 4870 (29.45)  | 1055 (25.5)  | 2537 (28.27) | 1278 (37.3)  |      |
| 17-20                            | 8775 (53.06)  | 2375 (57.41) | 4882 (54.4)  | 1518 (44.31) |      |
| ≥21                              | 1465 (8.86)   | 443 (10.71)  | 838 (9.34)   | 184 (5.37)   |      |
| No response                      | 957 (5.79)    | 162 (3.92)   | 494 (5.5)    | 301 (8.79)   |      |

**Table S1.** Participants' demographic information for the entire dataset and across the three clusters. Number of patients is indicated, with % in parenthesis. \* Reflects the results of a Chi<sup>2</sup>

test (categories with less than a minimum of 5 patients per group were removed) comparing across clusters.

| <b>Body region</b>     | <b>CHOIR body map segments</b>                     |
|------------------------|----------------------------------------------------|
| Front of Head          | 1, 2, 3, 4                                         |
| Back of Head           | 37, 38, 39, 40                                     |
| Neck                   | 5, 6, 41, 42                                       |
| Chest/Abdomen          | 8, 9, 16, 17                                       |
| Upper Back             | 44, 45, 48, 49                                     |
| Lower Back             | 54, 55                                             |
| Pelvic                 | 21, 22                                             |
| Right Shoulder/Arm     | 7, 11, 13, 15, 19, 25, 46, 50, 52, 56, 62, 64      |
| Left Shoulder/Arm      | 10, 12, 14, 18, 24, 28, 43, 47, 51, 53, 57, 63     |
| Right Hip/Buttocks/Leg | 20, 26, 29, 31, 33, 35, 60, 61, 66, 68, 70, 72, 74 |
| Left Hip/Buttocks/Leg  | 23, 27, 30, 32, 34, 36, 58, 59, 65, 67, 69, 71, 73 |

**Table S2.** CHOIR body map regions and their associated segments (see also Fig. S1).

|                                | Descriptive (M±SD) |              |              | Main Effect of Cluster |         |         | C1 vs. C2 |           | C1 vs. C3 |           | C2 vs. C3 |           |
|--------------------------------|--------------------|--------------|--------------|------------------------|---------|---------|-----------|-----------|-----------|-----------|-----------|-----------|
|                                | C1                 | C2           | C3           | F                      | df      | P*      | P^        | Cohen's D | P^        | Cohen's D | P^        | Cohen's D |
| <b>Clustering symptoms:</b>    |                    |              |              |                        |         |         |           |           |           |           |           |           |
| Fatigue                        | 49.84±9.68         | 58.35±8.96   | 67.37±7.61   | 676.62                 | 2, 3814 | <0.0001 | <0.0001   | 0.91      | <0.0001   | 2.01      | <0.0001   | 1.09      |
| Sleep Disturbance              | 49.13±8.67         | 56.45±7.29   | 65.97±7.54   | 830.78                 | 2, 3814 | <0.0001 | <0.0001   | 0.91      | <0.0001   | 2.07      | <0.0001   | 1.28      |
| Sleep Impairment               | 46.13±9.1          | 56.56±7.28   | 67.33±6.86   | 1344.73                | 2, 3814 | <0.0001 | <0.0001   | 1.27      | <0.0001   | 2.63      | <0.0001   | 1.52      |
| Depression                     | 41.77±6.53         | 54.84±6.59   | 67.23±5.93   | 2785.15                | 2, 3814 | <0.0001 | <0.0001   | 1.99      | <0.0001   | 4.08      | <0.0001   | 1.98      |
| Anxiety                        | 43.14±6.75         | 55.98±6.37   | 68.12±5.68   | 2773.84                | 2, 3814 | <0.0001 | <0.0001   | 1.96      | <0.0001   | 4.00      | <0.0001   | 2.01      |
| Anger                          | 37.58±6.96         | 50.05±7.03   | 62.33±7.65   | 2175.22                | 2, 3814 | <0.0001 | <0.0001   | 1.78      | <0.0001   | 3.38      | <0.0001   | 1.67      |
| Social Isolation               | 37.25±6.65         | 47.94±7.36   | 58.16±7.57   | 1511.44                | 2, 3814 | <0.0001 | <0.0001   | 1.52      | <0.0001   | 2.93      | <0.0001   | 1.37      |
| Emotional Support              | 53.99±10.11        | 51.04±8.98   | 48.68±8.84   | 61.47                  | 2, 3814 | <0.0001 | <0.0001   | 0.31      | <0.0001   | 0.56      | <0.0001   | 0.26      |
| Satisfaction w/ Soc. Roles     | 51.93±10.04        | 41.79±8.17   | 34.73±8.14   | 762.22                 | 2, 3814 | <0.0001 | <0.0001   | 1.11      | <0.0001   | 1.88      | <0.0001   | 0.87      |
| <b>Pain-specific measures:</b> |                    |              |              |                        |         |         |           |           |           |           |           |           |
| Pain Intensity                 | 5.13±2.43          | 5.89±1.96    | 7.21±1.79    | 173.39                 | 2, 3814 | <0.0001 | <0.0001   | 0.40      | <0.0001   | 1.50      | <0.0001   | 1.04      |
| # Bodymap Segments             | 8.46±9.68          | 11.69±11.39  | 17.71±15.67  | 88.49                  | 2, 3279 | <0.0001 | <0.0001   | 0.24      | <0.0001   | 1.15      | <0.0001   | 0.54      |
| Pain Duration                  | 95.14±132.12       | 97.03±124.25 | 99.51±119.86 | 0.17                   | 2, 3613 | 0.846   | 0.724     | 0.02      | 0.575     | 0.05      | 0.71      | 0.03      |
| Pain Interference              | 58±8.34            | 63.79±6.56   | 70.39±5.87   | 557.71                 | 2, 3814 | <0.0001 | <0.0001   | 0.93      | <0.0001   | 2.67      | <0.0001   | 1.59      |
| Pain Behavior                  | 54.89±6.73         | 58.65±4.38   | 61.92±3.32   | 371.14                 | 2, 3814 | <0.0001 | <0.0001   | 0.97      | <0.0001   | 2.27      | <0.0001   | 1.39      |
| Physical function              | 42.62±10.71        | 37.26±8.49   | 31.44±6.92   | 106.97                 | 2, 1378 | <0.0001 | <0.0001   | 0.69      | <0.0001   | 1.86      | <0.0001   | 1.19      |
| Phys. Func.-Mobility           | 46.09±10.63        | 41.75±9.49   | 36.17±8.42   | 111.29                 | 2, 2433 | <0.0001 | <0.0001   | 0.48      | <0.0001   | 1.48      | <0.0001   | 0.94      |
| Phys. Func.-Up. Extrem.        | 45.28±10.28        | 40.79±10.05  | 34±10.23     | 128.48                 | 2, 2433 | <0.0001 | <0.0001   | 0.44      | <0.0001   | 1.59      | <0.0001   | 0.94      |
| Pain Catastrophizing           | 12.86±10.19        | 21.6±11.12   | 36.37±9.91   | 753.77                 | 2, 3598 | <0.0001 | <0.0001   | 0.83      | <0.0001   | 2.99      | <0.0001   | 2.11      |

**Table S3.** Clustering symptoms and pain-specific measures as per the three clusters in the *validation* dataset (n=3817). M=mean, SD=standard deviation; C1=Cluster1, C2=Cluster2; C3=Cluster3. \*Bonferroni threshold for ANOVA main effects of cluster is set at  $p=0.0028$  ^Bonferroni threshold for t-test comparisons between each two clusters is set at  $p=0.0009$



|                                | Descriptive (M±SD) |              |               | Main Effect of Cluster |         |         | C1 vs. C2 |           | C1 vs. C3 |           | C2 vs. C3 |           |
|--------------------------------|--------------------|--------------|---------------|------------------------|---------|---------|-----------|-----------|-----------|-----------|-----------|-----------|
|                                | C1                 | C2           | C3            | F                      | df      | p*      | P^        | Cohen's D | P^        | Cohen's D | P^        | Cohen's D |
| <b>Clustering symptoms:</b>    |                    |              |               |                        |         |         |           |           |           |           |           |           |
| Fatigue                        | 53.02±9.47         | 59.37±8.6    | 67.62±7.16    | 155.85                 | 2, 1270 | <0.0001 | <0.0001   | 0.70      | <0.0001   | 1.74      | <0.0001   | 1.04      |
| Sleep Disturbance              | 48.68±8.87         | 56.85±7.23   | 64.93±7.2     | 252.70                 | 2, 1270 | <0.0001 | <0.0001   | 1.01      | <0.0001   | 2.01      | <0.0001   | 1.12      |
| Sleep Impairment               | 46.29±8.44         | 56.73±7.85   | 66.78±6.56    | 381.60                 | 2, 1270 | <0.0001 | <0.0001   | 1.28      | <0.0001   | 2.71      | <0.0001   | 1.39      |
| Depression                     | 43.3±6.53          | 54.84±6.65   | 66.97±5.94    | 721.08                 | 2, 1270 | <0.0001 | <0.0001   | 1.75      | <0.0001   | 3.79      | <0.0001   | 1.92      |
| Anxiety                        | 44.26±6.5          | 55.92±6.52   | 67.4±5.48     | 727.29                 | 2, 1270 | <0.0001 | <0.0001   | 1.79      | <0.0001   | 3.85      | <0.0001   | 1.91      |
| Anger                          | 38.79±7.66         | 50.44±7.26   | 61.28±7.13    | 523.95                 | 2, 1270 | <0.0001 | <0.0001   | 1.56      | <0.0001   | 3.04      | <0.0001   | 1.51      |
| Social Isolation               | 38.24±6.84         | 48.5±7.13    | 59.19±6.44    | 495.58                 | 2, 1270 | <0.0001 | <0.0001   | 1.47      | <0.0001   | 3.15      | <0.0001   | 1.57      |
| Emotional Support              | 53.43±9.96         | 50.97±9.47   | 47.74±8.17    | 19.79                  | 2, 1270 | <0.0001 | <0.0005   | 0.25      | <0.0001   | 0.62      | <0.0001   | 0.37      |
| Satisfaction w/ Soc. Roles     | 49.6±9.91          | 41.02±7.81   | 33.52±6.81    | 218.01                 | 2, 1270 | <0.0001 | <0.0001   | 0.96      | <0.0001   | 1.89      | <0.0001   | 1.02      |
| <b>Pain-specific measures:</b> |                    |              |               |                        |         |         |           |           |           |           |           |           |
| Pain Intensity                 | 5.39±2.06          | 6.05±1.85    | 6.95±1.64     | 37.59                  | 2, 1270 | <0.0001 | <0.0001   | 0.38      | <0.0001   | 1.19      | <0.0001   | 0.78      |
| # Bodymap Segments             | 9.27±11.63         | 12.77±12.44  | 18.88±16.03   | 24.12                  | 2, 980  | <0.0001 | 0.0005    | 0.24      | <0.0001   | 1.09      | <0.0001   | 0.54      |
| Pain Duration                  | 118.85±161.08      | 99.14±123.74 | 114.22±128.99 | 2.10                   | 2, 1017 | 0.12    | 0.06      | 0.16      | 0.78      | 0.05      | 0.19      | 0.17      |
| Pain Interference              | 59.9±7.02          | 64.73±5.97   | 69.81±5.92    | 140.15                 | 2, 1270 | <0.0001 | <0.0001   | 0.81      | <0.0001   | 2.35      | <0.0001   | 1.21      |
| Pain Behavior                  | 55.86±5.48         | 59.09±3.61   | 61.83±3.07    | 125.90                 | 2, 1270 | <0.0001 | <0.0001   | 0.96      | <0.0001   | 2.34      | <0.0001   | 1.26      |
| Physical function              | 41.42±8.82         | 37.23±8.16   | 31.74±6.33    | 58.40                  | 2, 931  | <0.0001 | <0.0001   | 0.57      | <0.0001   | 1.68      | <0.0001   | 1.23      |
| Phys. Func.-Mobility           | 45.1±9.1           | 40.41±9.53   | 34.98±8.36    | 16.21                  | 2, 336  | <0.0001 | <0.0005   | 0.52      | <0.0001   | 1.50      | <0.0001   | 0.92      |
| Phys. Func.-Up. Extrem.        | 45.4±9.53          | 41.84±9.25   | 37.12±8.08    | 10.98                  | 2, 336  | <0.0001 | <0.0005   | 0.41      | <0.0001   | 1.27      | <0.0001   | 0.83      |
| Pain Catastrophizing           | 15.27±10.53        | 23.24±10.68  | 36.58±8.85    | 227.25                 | 2, 1270 | <0.0001 | <0.0001   | 0.81      | <0.0001   | 2.82      | <0.0001   | 2.13      |

**Table S4.** Clustering symptoms and pain-specific measures as per the three clusters in the *longitudinal* dataset, at baseline (n=1273). M=mean, SD=standard deviation; C1=Cluster1, C2=Cluster2; C3=Cluster3. \*Bonferroni threshold for ANOVA main effects of cluster is set at  $p=0.0028$  ^Bonferroni threshold for t-test comparisons between each two clusters is set at  $p=0.0009$

| <b>Linkage methods</b> | <b>Agglomerative coefficient</b> |
|------------------------|----------------------------------|
| Single                 | 0.440                            |
| Average                | 0.670                            |
| McQuitty               | 0.749                            |
| Complete               | 0.846                            |
| <b>Ward</b>            | <b>0.920</b>                     |

**Table S5.** Agglomerative coefficient values of various linkage methods that were combined with the Euclidian distance metric.
